# Supplementary material for: Evaluating the Effect of Iron(III) in the Preparation of a Conductive Porous Composite Using a Biomass Waste-Based Starch Template
Source: MDPI journal article supplement (doi:10.3390/polym15112560), 2023-06-02
Supplement: s1 [file s1]

Supporting Information:

## **Evaluating the effect of iron(III) in the preparation of a conductive porous composite using a biomass waste-based starch template**

**Laria Rodríguez-Quesada<sup>1\*</sup>, Karla Ramírez-Sánchez<sup>2</sup>, Sebastián León-Carvajal<sup>1</sup>, Giovanni Sáenz-Arce<sup>3-4</sup>, Fabián Vásquez-Sancho<sup>5-6</sup>, Esteban Avendaño-Soto<sup>5-6</sup>, Juan José Montero-Rodríguez<sup>7</sup> and Ricardo Starbird-Perez<sup>2\*</sup>**

<sup>1</sup> Master Program in Medical Devices Engineering, Instituto Tecnológico de Costa Rica, Cartago 159-7050, Costa Rica.

<sup>2</sup> Centro de Investigación en Servicios Químicos y Microbiológicos (CEQIATEC), Escuela de Química, Instituto Tecnológico de Costa Rica, Cartago 159-7050, Costa Rica

<sup>3</sup> Departamento de Física, Facultad de Ciencias Exactas y Naturales, Universidad Nacional, Heredia 86-3000, Costa Rica

<sup>4</sup> Centro de Investigación en Óptica y Nanofísica, Departamento de Física, Universidad de Murcia, 30100 Murcia, Spain

<sup>5</sup> Materials Research Science and Engineering Center (CICIMA), University of Costa Rica, San José 11501-2060, Costa Rica

<sup>6</sup> School of Physics, University of Costa Rica, San José 11501-2060, Costa Rica

<sup>7</sup> Escuela de Ingeniería Electrónica, Instituto Tecnológico de Costa Rica, Cartago 159-7050, Costa Rica;

\* Correspondence: larodriguez@itcr.ac.cr (L.R.-Q.); rstarbird@itcr.ac.cr (R.S.-P.)

## Contents:

**Table S1** Physical properties of the porous obtained materials at each stage of synthesis.

**Table S2** Physisorption Nitrogen physisorption data of cryogel template and conductive porous composites at different soaking times.

**Table S3** Elemental composition of porous structures synthesized with PEDOT at different immersion times in iron(III) solution.

**Table S4.** Fitting of electrochemical impedance spectroscopy data using the R(RQ)(RQ) circuit model.

**Figure S1.** Starch template chemical and electrical measurements: elemental mapping (a) SEM imagen, (b) carbon, (c) oxygen (d) energy-dispersive spectroscopy spectra and (e) Nyquist plot (inset shows cyclic voltammetry (CV) curve).

**Figure S2.** Infrared spectroscopy of the different samples polymerized after being soaked for (a) 0.5, (b) 8, (c) 24, and (d) 48 hours in an iron(III) solution.

**Table S1. Physical properties of the porous obtained materials at each stage of synthesis.**

| Sample             | $\rho_{\text{skel}}$<br>$\text{g}\cdot\text{cm}^{-3}$ | $\rho_{\text{bulk}}$<br>$\text{g}\cdot\text{cm}^{-3}$ | $\varepsilon$<br>% | $V_p$             |
|--------------------|-------------------------------------------------------|-------------------------------------------------------|--------------------|-------------------|
| St                 | $1.470 \pm 0.010$                                     | $0.140 \pm 0.010$                                     | $90.476 \pm 5.849$ | $6.460 \pm 0.417$ |
| St/iron(III)       | $1.500 \pm 0.006$                                     | $0.195 \pm 0.003$                                     | $87.000 \pm 1.382$ | $4.460 \pm 0.070$ |
| St/iron(III)/PEDOT | $1.337 \pm 0.008$                                     | $0.201 \pm 0.010$                                     | $84.966 \pm 4.257$ | $4.227 \pm 0.211$ |

**Table S2. Physisorption Nitrogen physisorption data of cryogel template and conductive porous composites at different soaking times.**

| Sample         | $V_p$<br>$\text{Cc}\cdot\text{g}^{-1}$ | Pore<br>Radius<br>nm | Surface area<br>$\text{m}^2\cdot\text{g}^{-1}$ |
|----------------|----------------------------------------|----------------------|------------------------------------------------|
| St- 0 h        | 0.003                                  | 2.01                 | 6.899                                          |
| PEDOT-St 0.5 h | 0.004                                  | 2.01                 | 5.096                                          |
| PEDOT-St 8 h   | 0.002                                  | 2.02                 | 0.357                                          |
| PEDOT-St 24 h  | 0.002                                  | 1.63                 | 0.225                                          |
| PEDOT-St 48 h  | 0.000                                  | 1.17                 | 0.316                                          |

**Table S3. Elemental composition of porous structures synthesized with PEDOT at different immersion times in iron(III) solution.**

| Soaking time in<br>iron(III) solution<br>(hours) | Element (%) |       |      |       |
|--------------------------------------------------|-------------|-------|------|-------|
|                                                  | N           | C     | H    | S     |
| 0.5                                              | 0.06        | 43.09 | 5.61 | 10.28 |
| 8                                                | 0.06        | 47.20 | 4.45 | 18.07 |
| 24                                               | 0.04        | 44.81 | 4.76 | 14.86 |
| 48                                               | 0.06        | 41.65 | 5.49 | 9.70  |

**Table S4. Fitting of electrochemical impedance spectroscopy data using the R(RQ)(RQ) circuit model.**

| Circuit element  | Immersion time in iron(III) (h) |                       |                        |                        |
|------------------|---------------------------------|-----------------------|------------------------|------------------------|
|                  | 0.5                             | 8                     | 24                     | 48                     |
| Rs1 ( $\Omega$ ) | 2502.2                          | 31137                 | $9.4186\text{E}^5$     | $1.5582\text{E}^5$     |
| Rp1 ( $\Omega$ ) | 3949.7                          | $1.482\text{E}^7$     | $3.5438\text{E}^7$     | $1.993\text{E}^5$      |
| CPE1 (F)         | $5.636\text{E}^{-12}$           | $1.125\text{E}^{-10}$ | $1.277\text{E}^{-10}$  | $6.516\text{E}^{-10}$  |
| CPE1.N           | 0.84                            | 0.83731               | 0.52077                | 0.82964                |
| Rs2 ( $\Omega$ ) | -                               | -                     | 1355.9                 | 2627.4                 |
| Rp2 ( $\Omega$ ) | -                               | -                     | $5.2739\text{E}^6$     | $1.9695\text{E}^5$     |
| CPE2 (F)         | -                               | -                     | $5.8335\text{E}^{-12}$ | $1.0885\text{E}^{-11}$ |
| CPE2.N           | -                               | -                     | 0.92928                | 0.81716                |

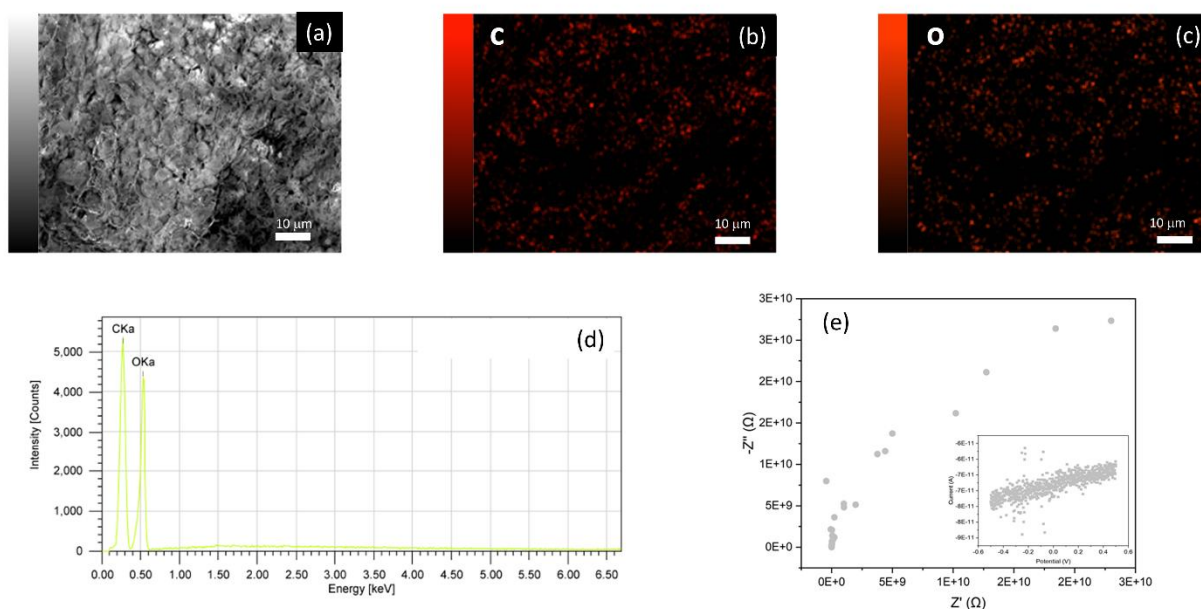

**Figure S1.** Starch template chemical and electrical measurements: elemental mapping (a) SEM image, (b) carbon, (c) oxygen (d) energy-dispersive spectroscopy spectra and (e) Nyquist plot (inset shows cyclic voltammetry curve).

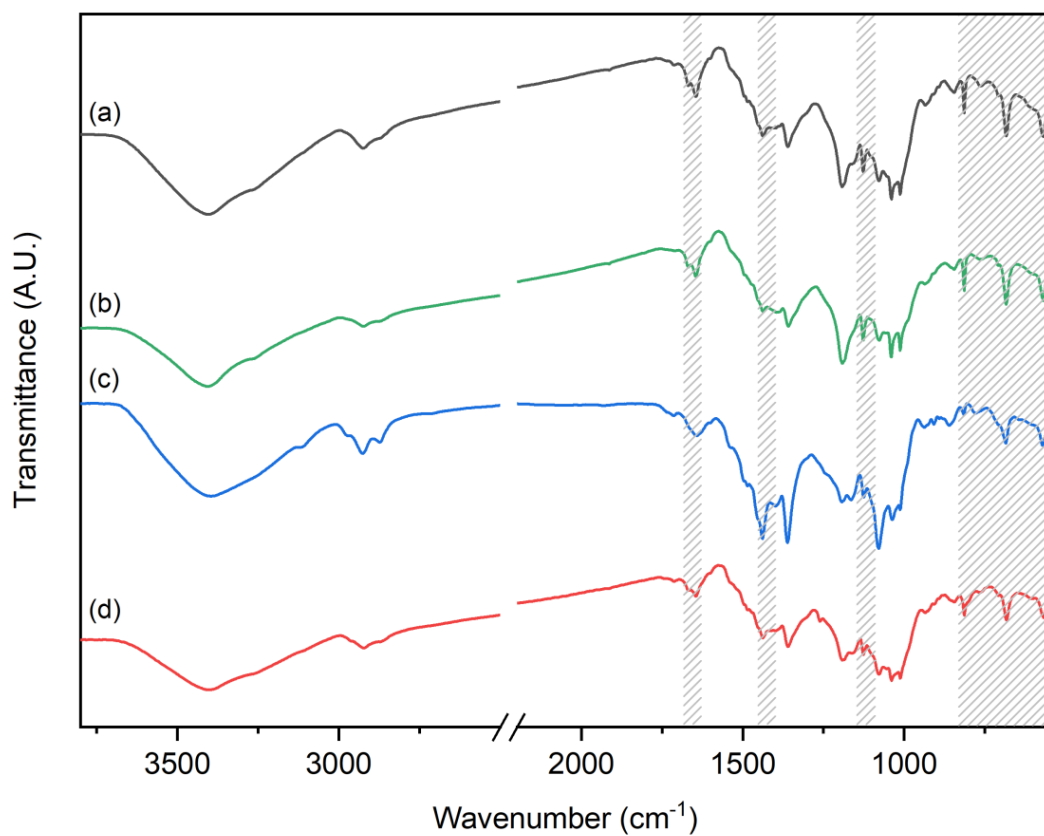

**Figure S2.** Infrared spectroscopy of the different samples polymerized after being soaked for (a) 0.5, (b) 8, (c) 24, and (d) 48 hours in an iron(III) solution.
